# Supplementary material
Source: publisher figshare collection journal article supplement (https://tandf.figshare.com/ndownloader/files/14810318)
Supplement: Supplementary file 1 [file 14810318]

**Supplementary material**

Table 1S. Kinetic order of the psychotropic pharmaceuticals phototransformation

| Name | Bi2O3 | CeO2 | Co3O4 | Fe2O3 | NiO | Pr6O11 | SnO2 | SrTiO3 | TiO2 | WO3 | ZnFe2O4 | ZnO | ZrO2 | RWa | UWb |
| --- | --- | --- | --- | --- | --- | --- | --- | --- | --- | --- | --- | --- | --- | --- | --- |
| Trazodone | I | I | I | I | I | I | I | I | I | I | I | I | I | I | I |
| Citalopram | II | I | I | II | I | I | I | II | I | I | I | II | I | I | II |
| Clorazepic Acid | I | I | I | II | I | NODd | II | II | I | I | I | II | I | NODd | NODd |
| Chlorpromazine | –c | –c | –c | –c | –c | –c | –c | –c | –c | –c | I | –c | –c | –c | –c |
| Promazine | I | I | I | I | I | I | I | I | I | I | I | I | I | I | I |
| Chlorprothixene | I | I | I | I | I | I | I | I | I | I | I | I | I | I | I |
| Doxepin | I | I | I | I | I | I | I | I | I | I | I | I | I | I | I |
| Fluphenazine | –c | II | –c | –c | –c | –c | –c | –c | –c | –c | –c | I | –c | –c | –c |
| Quetiapine | I | I | I | I | 0 | I | I | I | I | I | I | I | I | I | I |
| Opipramol | 0 | I | I | I | 0 | 0 | 0 | 0 | I | I | 0 | I | 0 | I | I |
| Tiapride | I | I | I | I | I | 0 | I | II | I | II | I | I | I | I | I |
| Loxapine | I | I | I | I | 0 | I | II | 0 | I | I | 0 | I | 0 | 0 | I |
| Sertraline | I | I | I | 0 | 0 | I | I | 0 | I | I | 0 | I | I | 0 | II |
| Reboxetine | II | II | I | I | II | I | II | I | I | II | I | I | I | I | II |
| Risperidone | I | I | I | I | I | I | I | I | I | II | I | II | I | I | II |
| Amisulpride | I | I | I | I | I | I | I | I | I | I | I | I | I | I | I |
| Moclobemide | I | I | I | I | I | I | I | I | I | I | I | I | I | I | I |
| Fluoxetine | I | I | I | I | I | I | I | I | I | I | I | II | I | I | I |
| Fluvoxamine | I | I | I | I | I | I | I | II | II | I | I | II | I | I | II |
| Paroxetine | I | I | I | I | I | 0 | I | I | I | I | I | I | I | I | I |
| Ziprasidone | –c | –c | –c | –c | –c | –c | –c | I | I | I | –c | I | –c | –c | –c |
| Agomelatine | I | I | I | I | I | II | I | I | I | I | I | I | I | I | I |
| Clozapine | I | I | I | I | I | I | I | 0 | I | I | II | I | 0 | 0 | II |
| Olanzapine | I | I | I | I | I | I | I | I | I | I | I | I | I | I | I |
| Carbamazepine | I | I | I | I | I | II | I | I | I | I | I | I | I | I | I |
| Thioridazine | I | I | I | I | I | I | I | I | I | I | I | I | I | I | I |

a – River Water

b – Ultrapure Water

c – compound not detected after 10 min of irradiation

d – non-observable decomposition


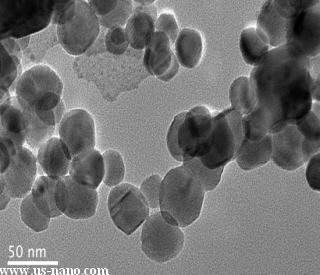


Fig. 1S. TEM image of Bi2O3


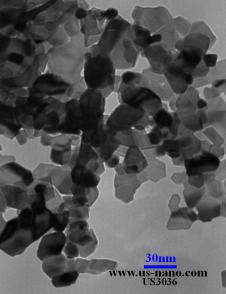


Fig. 2S. TEM image of CeO2


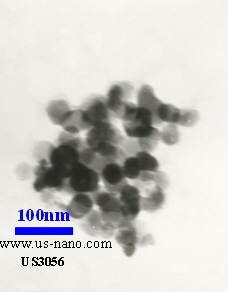


Fig. 3S. TEM image of Co3O4


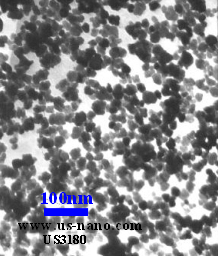


Fig. 4S. TEM image of Fe2O3-alpha


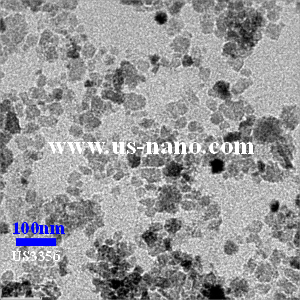


Fig. 5S. TEM image of NiO


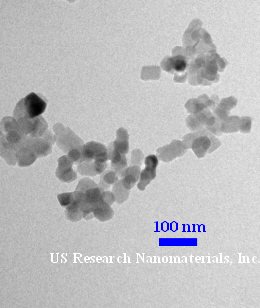


Fig. 6S. TEM image of Pr6O11


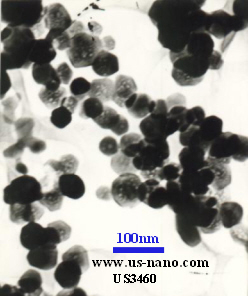


Fig. 7S. TEM image of SnO2


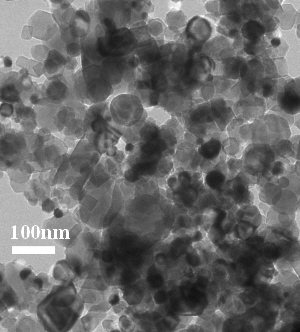


Fig. 8S. TEM image of SrTiO3


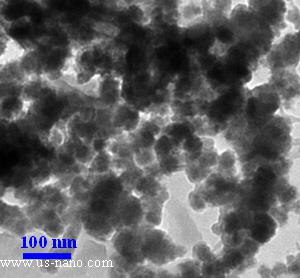


Fig. 9S. TEM image of ZnFe2O4


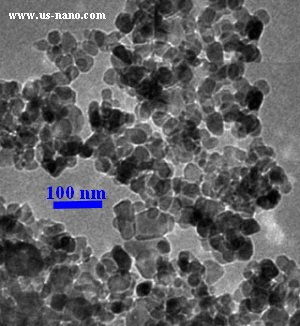


Fig. 10S. TEM image of ZrO2
